# Supplementary material for: Non-chromatographic determination of inorganic and total mercury by atomic absorption spectrometry based on a dielectric barrier discharge atomizer
Source: Royal Society of Chemistry journal article supplement (doi:10.1039/b924824b), 2010-01-01
Supplement: b924824b.pdf [file b924824b.pdf]

### Electronic supplementary information

Non-chromatographic determination of inorganic and total mercury by atomic absorption spectrometry based on a dielectric barrier discharge atomizer

Zhenli Zhu, Zhifu Liu, Hongtao Zheng, Shenghong Hu\*

Key Laboratory of Biogeology and Environmental Geology of Ministry of Education, China  
University of Geosciences, Wuhan, China, 430074.

Email: shhu@cug.edu.cn

### Figures

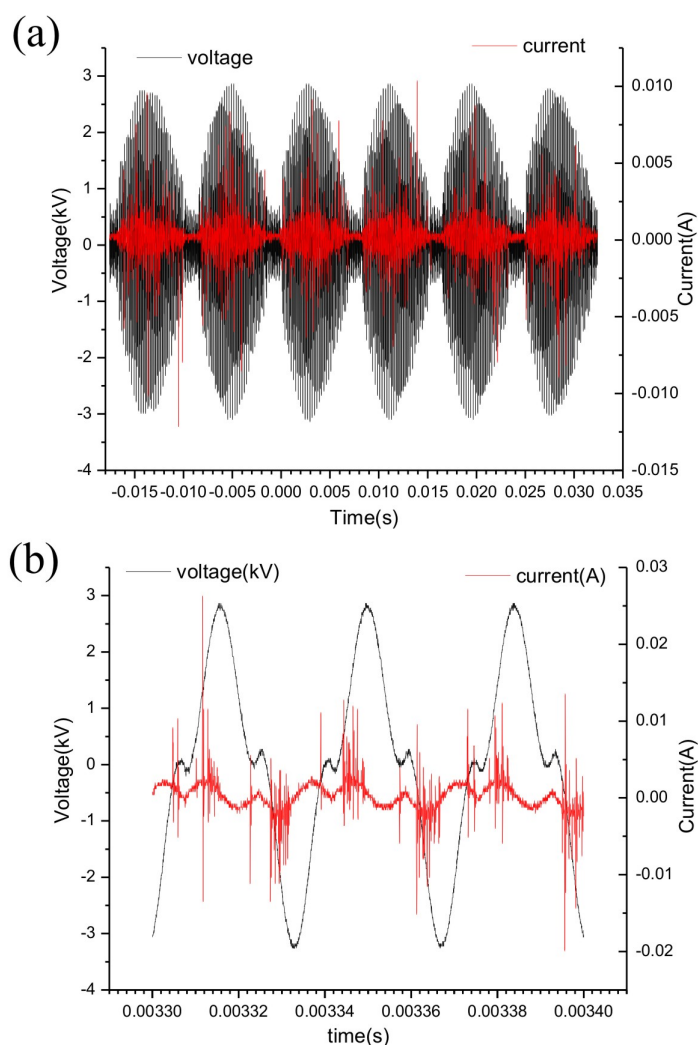

Fig. S1 The waveform of voltage and current. (a): the characteristics of voltage and current in several cycles; (b): the waveform of voltage and current around the peak voltage.

(a)

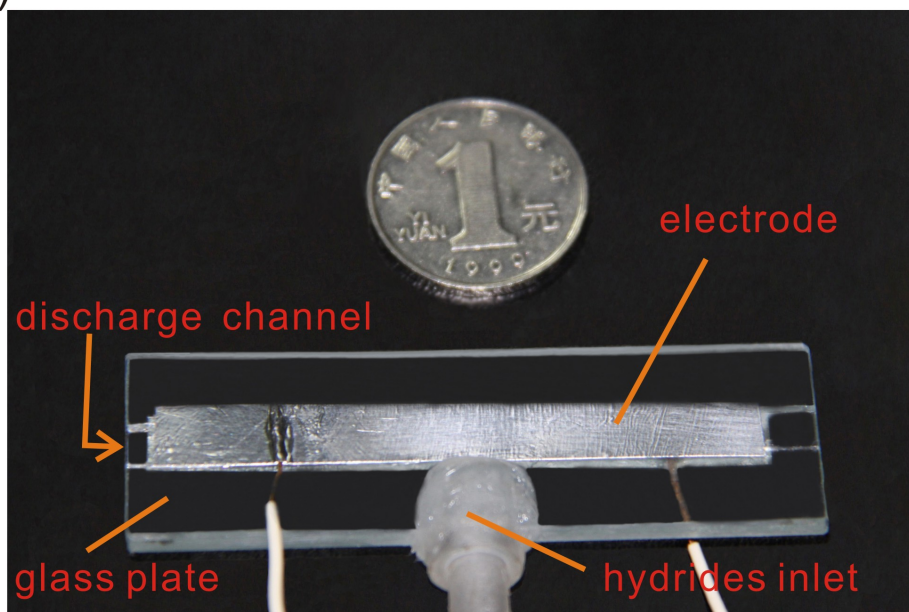

(b)

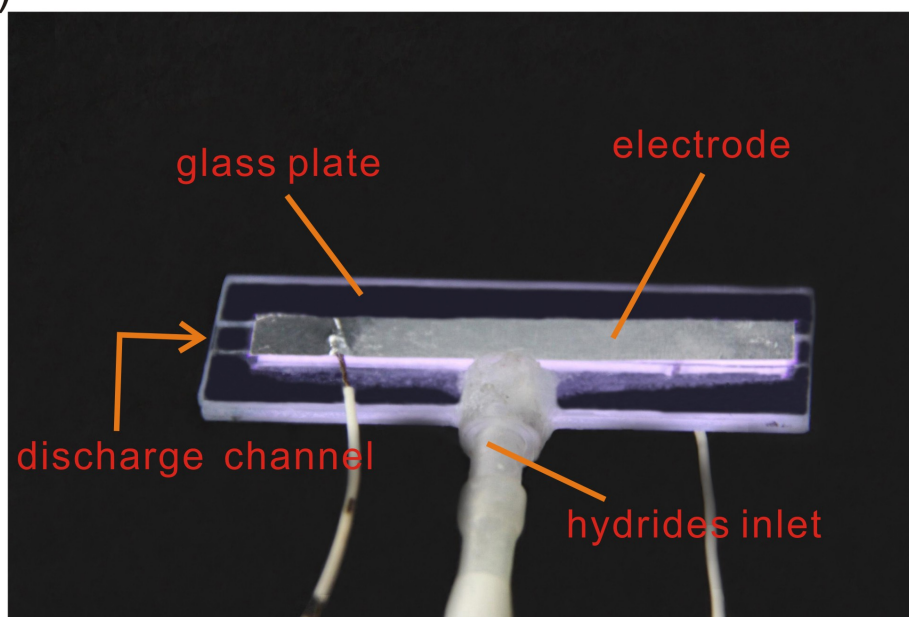

Fig. S2 The pictures of DBD atomizer. ((a) plasma off, a coin was put aside to indicate its size; (b) plasma on).
